# Supplementary material for: A Systematic Review of the Distribution of Tick-Borne Pathogens in Wild Animals and Their Ticks in the Mediterranean Rim between 2000 and 2021
Source: MDPI journal article supplement (doi:10.3390/microorganisms10091858), 2022-09-16
Supplement: s1 [file s1]

**Table S1.** TBP-positive engorged ticks collected from wild animals and their distribution in the Mediterranean Rim

| Tick genus           | Number of tick species and number of TBPs detected per species                                                                                                                                                             | Stage                      | Number of countries with data and countries                                                 | Number of tick host species with data, and host species                                                                                                                                                               | Number of pathogenic genera/species and pathogens detected in ticks ( <sup>b</sup> bacteria, <sup>p</sup> parasite, <sup>v</sup> virus)                                                                                                                                                                                                                                                                                                                                                                                                                                                                                                                                                                                                                                                                                                                                                                                                                                                                                                                                                                                                                                                                                                                                                                                                                                                                                                                    |
|----------------------|----------------------------------------------------------------------------------------------------------------------------------------------------------------------------------------------------------------------------|----------------------------|---------------------------------------------------------------------------------------------|-----------------------------------------------------------------------------------------------------------------------------------------------------------------------------------------------------------------------|------------------------------------------------------------------------------------------------------------------------------------------------------------------------------------------------------------------------------------------------------------------------------------------------------------------------------------------------------------------------------------------------------------------------------------------------------------------------------------------------------------------------------------------------------------------------------------------------------------------------------------------------------------------------------------------------------------------------------------------------------------------------------------------------------------------------------------------------------------------------------------------------------------------------------------------------------------------------------------------------------------------------------------------------------------------------------------------------------------------------------------------------------------------------------------------------------------------------------------------------------------------------------------------------------------------------------------------------------------------------------------------------------------------------------------------------------------|
| <i>Ixodes</i>        | 8<br><i>I. acuminatus</i> (5)<br><i>I. festai</i> (2)<br><i>I. frontalis</i> (4)<br><i>I. hexagonus</i> (2)<br><i>I. ricinus</i> (32)<br><i>I. simplex</i> (1)<br><i>I. ventralloi</i> (5)<br><i>I. vespertilionis</i> (3) | Adults, nymphs, and larvae | 7<br>Cyprus, France, Greece, Italy, Slovenia, Spain, and Turkey                             | 23<br>Badgers, bats, birds, chamois, fallow deer, genets, hares, hedgehogs, jackals, lizards, lynxes, martens, mongooses, mouflons, polecats, red deer, red foxes, rodents, roe deer, weasels, wild boars, and wolves | 39<br><i>Anaplasma</i> spp. <sup>b</sup> , <i>A. marginale</i> <sup>b</sup> , <i>A. phagocytophilum</i> <sup>b</sup> , <i>A. ovis</i> <sup>b</sup> , <i>Bartonella</i> spp. <sup>b</sup> , <i>B. acomodis</i> <sup>b</sup> , <i>B. bacilliformis</i> <sup>b</sup> , <i>B. bovis</i> <sup>b</sup> , <i>B. chomelli</i> <sup>b</sup> , <i>B. tamiae</i> <sup>b</sup> , <i>B. tribocorum</i> <sup>b</sup> , <i>B. vinsonnii berkoffi</i> <sup>b</sup> , <i>Babesia</i> spp. <sup>p</sup> , <i>Ba. capreoli</i> <sup>p</sup> , <i>Ba. microti</i> <sup>p</sup> , <i>Ba. ovis</i> <sup>p</sup> , <i>Ba. rodaini</i> <sup>p</sup> , <i>Ba. venatorum</i> <sup>p</sup> , <i>Bo. afzelii</i> <sup>p</sup> , <i>Bo. burgdoferi</i> s.l. <sup>b</sup> , <i>Bo. burgdoferi</i> s.s. <sup>b</sup> , <i>Bo. garinii</i> <sup>p</sup> , <i>Bo. lusitaniae</i> <sup>b</sup> , <i>Bo. spielmanii</i> <sup>b</sup> , <i>Bo. valaisiana</i> <sup>b</sup> , <i>Bo. turdi</i> <sup>b</sup> , CCHF <sup>v</sup> , <i>C. burneti</i> <sup>b</sup> , <i>Candidatus</i> Noehrlichia mikurensis <sup>b</sup> , <i>Rickettsia</i> spp. <sup>b</sup> , <i>R. aeschlimannii</i> <sup>b</sup> , <i>R. africae</i> <sup>b</sup> , <i>R. helvetica</i> <sup>b</sup> , <i>R. hoogstraalii</i> <sup>b</sup> , <i>R. monacensis</i> <sup>b</sup> , <i>R. sibirica</i> <sup>b</sup> , <i>R. slovaca</i> <sup>b</sup> , <i>Theileria</i> spp. <sup>p</sup> ., and <i>T. annae</i> <sup>p</sup> |
| <i>Rhipicephalus</i> | 6<br><i>Rh (B). annulatus</i> (1)<br><i>Rh. bursa</i> (14)<br><i>Rh (B). kohlsi</i> (1)<br><i>Rh. ovis</i> (1)<br><i>Rh. pusillus</i> (2)<br><i>Rh. sanguineus</i> s.l. (18)                                               | Adults, nymphs, and larvae | 7<br>Cyprus, Greece, Israel, Italy, Palestine, Spain, and Turkey                            | 15<br>Birds, fallow deer, genets, hares, hedgehogs, jackals, lynxes, martens, mongooses, mouflons, red deer, red foxes, roe deer, wild boars, and wolves                                                              | 22<br><i>Anaplasma</i> spp. <sup>b</sup> , <i>A. marginale</i> <sup>b</sup> , <i>A. phagocytophilum</i> <sup>b</sup> , <i>A. ovis</i> <sup>b</sup> , <i>Bartonella</i> spp. <sup>b</sup> , <i>Babesia</i> spp. <sup>p</sup> , <i>Ba. rodaini</i> <sup>p</sup> , <i>Bo. burgdoferi</i> s.l. <sup>b</sup> , <i>Ch. abortus</i> <sup>b</sup> , <i>C. burneti</i> <sup>b</sup> , <i>Ehrlichia</i> spp. <sup>b</sup> , <i>E. canis</i> <sup>b</sup> , <i>Rickettsia</i> spp. <sup>b</sup> , <i>R. massiliae</i> <sup>b</sup> , <i>R. slovaca</i> <sup>b</sup> , <i>Candidatus</i> <i>R. barbariae</i> <sup>b</sup> , <i>R. sibirica mongolitimonae</i> <sup>b</sup> , <i>Candidatus</i> <i>R. goldwasserii</i> <sup>b</sup> , <i>Theileria</i> spp. <sup>p</sup> , <i>T. buffeli</i> <sup>p</sup> , <i>T. orientalis</i> <sup>p</sup> , <i>T. ovis</i> <sup>p</sup> , and <i>T. sergenti</i> <sup>p</sup>                                                                                                                                                                                                                                                                                                                                                                                                                                                                                                                                                       |
| <i>Haemaphysalis</i> | 5<br><i>H. adleri</i> (1)<br><i>H. erinacei</i> (1)<br><i>H. parva</i> (3)<br><i>H. punctata</i> (11)<br><i>H. sulcata</i> (5)                                                                                             | Adults, nymphs, and larvae | 7<br>Cyprus, Greece, Israel, Italy, Slovenia, Spain, and Turkey                             | 13<br>Birds, fallow deer, golden jackals, hares, hedgehogs, lizards, martens, mouflons, red deer, red foxes, rodents, roe deer, and wild boars                                                                        | 21<br><i>Anaplasma</i> spp. <sup>b</sup> , <i>A. phagocytophilum</i> <sup>b</sup> , <i>A. ovis</i> <sup>b</sup> , <i>B. bacilliformis</i> <sup>b</sup> , <i>B. bovis</i> <sup>b</sup> , <i>B. chomelli</i> <sup>b</sup> , <i>Ba. crassa</i> <sup>p</sup> , <i>Ba. rossii</i> <sup>b</sup> , <i>Borrelia</i> spp. <sup>b</sup> , <i>Bo. garinii</i> <sup>b</sup> , <i>Ch. abortus</i> <sup>b</sup> , <i>C. burneti</i> <sup>b</sup> , <i>E. canis</i> <sup>b</sup> , <i>Rickettsia</i> spp. <sup>b</sup> , <i>R. aeschlimannii</i> <sup>b</sup> , <i>R. hoogstraalii</i> <sup>b</sup> , <i>R. massiliae</i> <sup>b</sup> , <i>R. monacensis</i> <sup>b</sup> , <i>R. slovaca</i> <sup>b</sup> , and <i>Candidatus</i> <i>R. goldwasserii</i> <sup>b</sup> ,                                                                                                                                                                                                                                                                                                                                                                                                                                                                                                                                                                                                                                                                                                 |
| <i>Hyalomma</i>      | 6<br><i>Hy. aegyptium</i> (4),<br><i>Hy. anatolicum excavatum</i> (1)<br><i>Hy. detritum</i> (1)<br><i>Hy. lusitanicum</i> (1)<br><i>Hy. marginatum</i> (13)<br><i>Hy. rufipes</i> (3)                                     | Adults, nymphs, and larvae | 10<br>Algeria, Cyprus, Greece, France, Israel, Italy, Morocco, Palestine, Spain, and Turkey | 12<br>Birds, fallow deer, hares, hedgehogs, lynxes, mouflons, red deer, red foxes, rodents, roe deer, tortoises, and wild boars                                                                                       | 16<br><i>A. marginale</i> <sup>b</sup> , <i>A. phagocytophilum</i> <sup>b</sup> , <i>Babesia</i> spp. <sup>p</sup> , <i>Ba. occultans</i> <sup>p</sup> , CCHF <sup>v</sup> , <i>C. burneti</i> <sup>b</sup> , <i>Ehrlichia</i> spp. <sup>b</sup> , <i>Rickettsia</i> spp. <sup>b</sup> , <i>R. aeschlimannii</i> <sup>b</sup> , <i>R. africae</i> <sup>b</sup> , <i>R. raoultii</i> <sup>b</sup> , Tamdy orthonairovirus <sup>v</sup> , <i>Theileria</i> spp. <sup>p</sup> , <i>T. buffeli</i> <sup>p</sup> , <i>T. orientalis</i> <sup>p</sup> and <i>T. sergenti</i> <sup>p</sup>                                                                                                                                                                                                                                                                                                                                                                                                                                                                                                                                                                                                                                                                                                                                                                                                                                                                        |
| <i>Dermacentor</i>   | 1<br><i>D. marginatus</i> (12)                                                                                                                                                                                             | Adults, nymphs, and larvae | 5<br>Algeria, France, Italy, Slovenia, and Spain                                            | 10<br>Chamois, hares, fallow deer, jackals, martens, red deer, red foxes, rodents, roe deer, and wild boars                                                                                                           | 12<br><i>A. marginale</i> <sup>b</sup> , <i>A. phagocytophilum</i> <sup>b</sup> , <i>B. bovis</i> <sup>b</sup> , <i>B. chomeli</i> <sup>b</sup> , <i>Babesia</i> spp. <sup>p</sup> , <i>Bo. burgdoferi</i> s.l. <sup>b</sup> , <i>Ehrlichia</i> spp. <sup>b</sup> , <i>E. canis</i> <sup>b</sup> , <i>Rickettsia</i> spp. <sup>b</sup> , <i>R. raoultii</i> <sup>b</sup> , <i>R. slovaca</i> <sup>b</sup> , and <i>Theileria</i> spp. <sup>p</sup>                                                                                                                                                                                                                                                                                                                                                                                                                                                                                                                                                                                                                                                                                                                                                                                                                                                                                                                                                                                                         |
| <i>Amblyomma</i>     | 1<br><i>Amblyomma</i> sp. (1)<br><i>Am. marmoreum</i> (2)                                                                                                                                                                  | Adults, nymphs, and larvae | 3<br>Greece, Israel, and Italy                                                              | 1<br>Birds                                                                                                                                                                                                            | 2<br><i>Ehrlichia</i> spp. <sup>b</sup> and <i>R. aeschlimannii</i> <sup>b</sup>                                                                                                                                                                                                                                                                                                                                                                                                                                                                                                                                                                                                                                                                                                                                                                                                                                                                                                                                                                                                                                                                                                                                                                                                                                                                                                                                                                           |
| <i>Ornithodoros</i>  | 3<br><i>O. erritacus</i> (3)<br><i>O. maritimus</i> (1)<br><i>O. normandi</i> (1)                                                                                                                                          | Adults                     | 3<br>Morocco, Spain, and Tunisia                                                            | 2<br>Bats and rodents                                                                                                                                                                                                 | 5<br><i>Bo. crocidurae</i> <sup>b</sup> , <i>Bo. hispanica</i> <sup>b</sup> , <i>Bo. merionesi</i> <sup>b</sup> , <i>Candidatus</i> <i>R. Africa septentrioalis</i> <sup>b</sup> , and Maeбан/Maeбан-like virus <sup>v</sup>                                                                                                                                                                                                                                                                                                                                                                                                                                                                                                                                                                                                                                                                                                                                                                                                                                                                                                                                                                                                                                                                                                                                                                                                                               |
| <i>Argas</i>         | 2<br><i>A. transgariepinus</i> (1)<br><i>A. vespertilionis</i> (2)                                                                                                                                                         | Adults                     | 1<br>Italy                                                                                  | 1<br>Bats                                                                                                                                                                                                             | 2<br><i>Bartonella</i> spp. <sup>b</sup> and <i>Rickettsia</i> spp. <sup>b</sup>                                                                                                                                                                                                                                                                                                                                                                                                                                                                                                                                                                                                                                                                                                                                                                                                                                                                                                                                                                                                                                                                                                                                                                                                                                                                                                                                                                           |
| Unknown              | X<br>X                                                                                                                                                                                                                     | X                          | 3<br>Greece, Palestine, and Turkey                                                          | 3<br>Birds, lizards, and rodents                                                                                                                                                                                      | 3<br><i>Rickettsia</i> spp. <sup>b</sup> , <i>R. aeschlimannii</i> <sup>b</sup> , and <i>R. africae</i> <sup>b</sup>                                                                                                                                                                                                                                                                                                                                                                                                                                                                                                                                                                                                                                                                                                                                                                                                                                                                                                                                                                                                                                                                                                                                                                                                                                                                                                                                       |

**Table S2:** TBP diversity in wild animals and their ticks from the Mediterranean Rim. \*Wild carnivores: Badger, Genet, Golden jackal, Marten, Mongoose, Otter and Wolf

| Animal name<br>(Number of<br>countries<br>with data<br>available) | Wild<br>boar (6)                        | Red<br>deer (5)                               | Birds (4)                                     | Rodent<br>(7)                                 | Wild<br>carnivores*<br>(6) | Red fox<br>(5)                   | Tortoise<br>(2)            | Fallow<br>deer (2)               | Roe<br>deer (1)                             | Hedgehog<br>(4) | Mouflon<br>(2)               | Lizard (2)     | Chamois<br>(2) | Hare (3)       | Bat (1)        | Porcupine<br>(2) | Swamp<br>deer (1) |
|-------------------------------------------------------------------|-----------------------------------------|-----------------------------------------------|-----------------------------------------------|-----------------------------------------------|----------------------------|----------------------------------|----------------------------|----------------------------------|---------------------------------------------|-----------------|------------------------------|----------------|----------------|----------------|----------------|------------------|-------------------|
| <b>Pathogens<br/>found in ticks</b>                               |                                         |                                               |                                               |                                               |                            |                                  |                            |                                  |                                             |                 |                              |                |                |                |                |                  |                   |
| <b>Number of<br/>studies</b>                                      | 26                                      | 24                                            | 21                                            | 18                                            | 13                         | 12                               | 12                         | 11                               | 8                                           | 8               | 7                            | 4              | 3              | 2              | 2              | 0                | 0                 |
| <b>Number of<br/>pathogens<br/>found in ticks</b>                 | Bacteria:<br>9<br>Parasite:<br>5        | Bacteria:<br>15<br>Parasite:<br>1<br>Virus: 1 | Bacteria:<br>16<br>Parasite:<br>4<br>Virus: 2 | Bacteria:<br>17<br>Parasite:<br>3<br>Virus: 1 | Bacteria: 8                | Bacteria:<br>8<br>Parasite:<br>5 | Bacteria:<br>4<br>Virus: 1 | Bacteria:<br>9<br>Parasite:<br>1 | Bacteria:<br>10<br>Parasite:<br>4           | Bacteria:<br>6  | Bacteria:7<br>Parasite:<br>4 | Bacteria:<br>9 | Bacteria:<br>2 | Bacteria:<br>5 | Bacteria:<br>4 |                  |                   |
| <b>Percentage of<br/>TBPs in ticks</b>                            | 27.9%                                   | 26.2%                                         | 36.1%                                         | 34.4%                                         | 13.1%                      | 21.3%                            | 9.9%                       | 16.4%                            | 22.9%                                       | 9.9%            | 18%                          | 14.8%          | 3.3%           | 8.2%           | 6.6%           | 0%               | 0%                |
| <b>Pathogens<br/>found in wild<br/>animals</b>                    |                                         |                                               |                                               |                                               |                            |                                  |                            |                                  |                                             |                 |                              |                |                |                |                |                  |                   |
| <b>Number of<br/>studies</b>                                      | 11                                      | 22                                            | 4                                             | 28                                            | 11                         | 13                               | 2                          | 6                                | 12                                          | 0               | 1                            | 3              | 3              | 3              | 0              | 3                | 2                 |
| <b>Number of<br/>pathogens<br/>found in<br/>animals</b>           | Bacteria:<br>3<br>Parasite:2<br>Virus:2 | Bacteria:<br>2<br>Parasite:<br>4              | Bacteria:<br>5                                | Bacteria:<br>20<br>Parasite:<br>2<br>Virus: 1 | Bacteria:2<br>Parasite:5   | Bacteria:<br>3<br>Parasite:<br>5 | Parasite:<br>1<br>Virus: 1 | Bacteria:<br>1                   | Bacteria:<br>2<br>Parasite:<br>6<br>Virus 2 | 0               | Bacteria:<br>3               | Parasite:2     | Parasite:<br>3 | Parasite:<br>2 | 0              | Bacteria:<br>1   | Bacteria: 2       |
| <b>Percentage of<br/>TBPs in<br/>animals</b>                      | 14%                                     | 12%                                           | 10%                                           | 46%                                           | 14%                        | 16%                              | 4%                         | 2%                               | 20%                                         | 0%              | 6%                           | 4%             | 6%             | 4%             | 0%             | 2%               | 4%                |
